# Supplementary material for: Catalytic Hairpin Assembly-Based Self-Ratiometric Gel Electrophoresis Detection Platform for Reliable Nucleic Acid Analysis
Source: MDPI journal article supplement (doi:10.3390/bios14050232), 2024-05-07
Supplement: s1 [file s1]

# Catalytic Hairpin Assembly-Based Self-Ratiometric Gel Electrophoresis Detection Platform for Reliable Nucleic Acid Analysis

Qiang Xi <sup>1</sup>, Si-Yi Wang <sup>1</sup>, Xiao-Bing Deng <sup>1,\*</sup> and Chong-Hua Zhang <sup>2,\*</sup>

<sup>1</sup> Hunan Prevention and Treatment Institute for Occupational Diseases, Affiliated Prevention and Treatment Institute for Occupational Diseases of University of South China, Changsha 410007, China; xiqiang@hnu.edu.cn (Q.X.); wangsiyi0066@163.com (S.-Y.W.)

<sup>2</sup> School of Chemistry and Chemical Engineering, Hunan University of Science and Technology, Xiangtan 411201, China

\* Correspondence: xdyjyk@163.com (X.-B.D.); chonghua1226@hnu.edu.cn (C.-H.Z.)

## Table of Contents

|      |                                                                                                                |
|------|----------------------------------------------------------------------------------------------------------------|
| S-2  | Scheme S1. Schematic illustration of catalytic hairpin assembly.                                               |
| S-3  | Table S1. Oligonucleotides sequences used in the experiment.                                                   |
| S-4  | Table S2. Recovery experiments for HBV detection in 10% human serum.                                           |
| S-5  | Table S3. Smart phone-combined DARGE assay for HBV detection.                                                  |
| S-6  | Table S4. Recovery experiments for miRNA-21 detection in 10% human serum.                                      |
| S-7  | Table S5. Smart phone-combined DARGE assay for miRNA-21 detection.                                             |
| S-8  | Figure S1. CHA-based non ratiometric gel electrophoresis analysis.                                             |
| S-9  | Figure S2. Optimization of experimental conditions on analytical performance in HBV assay.                     |
| S-10 | Figure S3. Schematic diagram of smartphone-based gel electrophoresis analysis for quantifying specific target. |
| S-11 | Figure S4. PhotoMetrix® application interfaces.                                                                |
| S-12 | Figure S5. Smart phone-combined DARGE ASSAY for HBV detection.                                                 |
| S-13 | Figure S6. Optimization of experimental conditions on analytical performance in miRNA assay.                   |
| S-14 | Figure S7. Smart phone-combined DARGE assay for HBV detection.                                                 |

**Scheme S1.** Schematic illustration of catalytic hairpin assembly

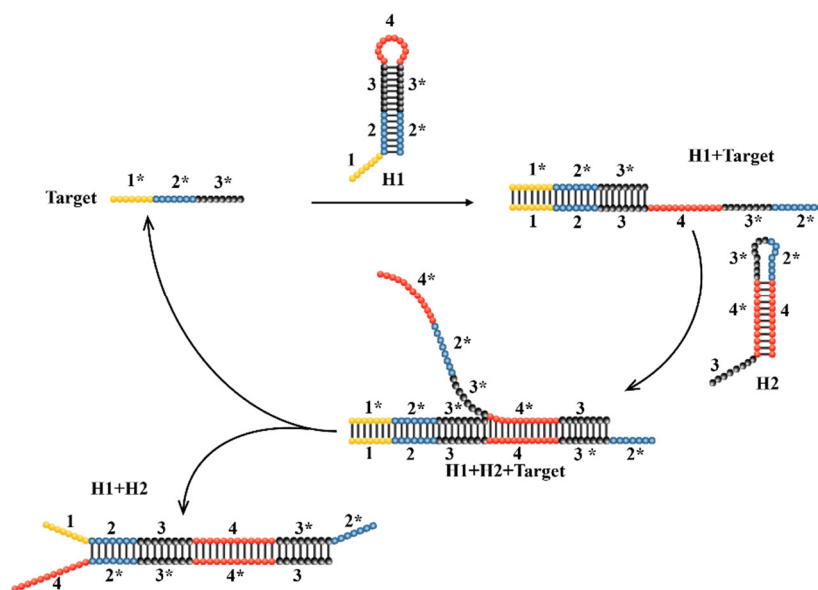

**Table S1.** Oligonucleotides sequences used in the experiment

| Name       | Sequence (5'-3')                                                           |
|------------|----------------------------------------------------------------------------|
| I          | CCCAGGTAACTTAGCTCACTGAC                                                    |
| H1         | GTCAGTGAGCTAAGTTAACCTGGGCCATGAGAAGAC<br>CCAGGTAACTTAGC                     |
| H2         | AAAAAACCTGGGTCTTCTCATGGCCCAGGTAACTTA<br>GCCCATGAGAAGAC                     |
| miRNA-141  | UAACACUGUCUGGUAAAGAUGG                                                     |
| miRNA-143  | UGAGAUGAAGCACUGUAGCUCA                                                     |
| miRNA-21   | UAGCUUAUCAGACUGAUGUUGA                                                     |
| miRNA-21-1 | UAGCUUAUCAGACUGAU <u>C</u> UUGA                                            |
| miRNA-21-2 | UAGCUUAUCAGACU <u>A</u> AUGUUGA                                            |
| miRNA-21-3 | UAGCUUAUCA <u>T</u> ACUGAUGUUGA                                            |
| cDNA-21    | TCAACATCAGTCTGATAAGCTA                                                     |
| H1-21      | TAGCTTATCAGACTGATGTTGACCATGAGAAGATCA<br>ACATCAGTCTGA                       |
| H2-21      | AAGATGTTGATCTTCTCATGGTCAACATCAGTCTGA<br>CCATGAGAAGAC                       |
| HBV        | TTGGCTTTCAGTTATATGGATGATGTGGTA                                             |
| MB         | CCCAGGTAACTTAGCTCACTGACTCCATATA<br>ACT <u>X</u> (AP)GAAAGCCAAGTCAGTGAGCTAA |

\* The underlined bases in miR-21s are mismatched bases. X represents abasic sites.

**Table S2.** Recovery experiments for HBV detection in 10% human serum

| <b>samples</b>     | <b>spiked</b> | <b>found</b> | <b>RSD<br/>(%, n=3)</b> | <b>Recovery<br/>(%)</b> |
|--------------------|---------------|--------------|-------------------------|-------------------------|
| 10% human<br>serum | 1.000 pM      | 1.072 pM     | 5.35                    | 107.2                   |
|                    | 5.000 pM      | 2.415 pM     | 3.29                    | 96.6                    |
|                    | 10.000 pM     | 3.163 pM     | 1.61                    | 105.4                   |

**Table S3.** Smart phone-combined DARGE assay for HBV detection

| <b>samples</b> | <b>spiked</b> | <b>found</b> | <b>RSD<br/>(%, n=3)</b> | <b>Recovery<br/>(%)</b> |
|----------------|---------------|--------------|-------------------------|-------------------------|
| PBS            | 1.000 pM      | 1.083 pM     | 4.42                    | 108.3                   |
|                | 2.500 pM      | 2.385 pM     | 3.53                    | 95.4                    |
|                | 3.000 pM      | 3.174 pM     | 1.36                    | 105.8                   |

**Table S4.** Recovery experiments for miRNA-21 detection in 10% human serum

| <b>samples</b>     | <b>spiked</b> | <b>found</b> | <b>RSD<br/>(%, n=3)</b> | <b>Recovery<br/>(%)</b> |
|--------------------|---------------|--------------|-------------------------|-------------------------|
| 10% human<br>serum | 1.000 pM      | 0.936 pM     | 3.81                    | 93.6                    |
|                    | 5.000 pM      | 5.415 pM     | 1.62                    | 108.3                   |
|                    | 10.000 pM     | 9.435 pM     | 2.37                    | 94.4                    |

**Table S5** Smart phone-combined DARGE assay for miRNA-21 detection

| <b>samples</b> | <b>spiked</b> | <b>found</b> | <b>RSD<br/>(%, n=3)</b> | <b>Recovery<br/>(%)</b> |
|----------------|---------------|--------------|-------------------------|-------------------------|
| PBS            | 0.700 pM      | 0.680 pM     | 3.73                    | 97.1                    |
|                | 1.000 pM      | 1.024 pM     | 1.53                    | 102.4                   |
|                | 1.500 pM      | 1.423 pM     | 2.29                    | 94.8                    |

a)

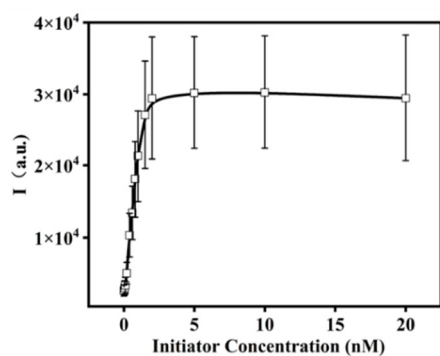

b)

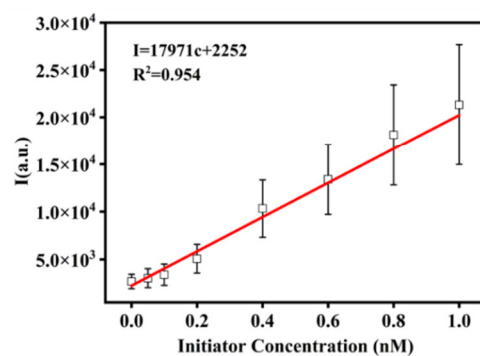

**Figure S1.** CHA-based non ratiometric gel electrophoresis analysis: (a) Band intensity versus target concentrations. (b) Linear correlation between I and target concentrations range from 0 to 1 nM. Error bars are standard deviations of three repetitive experiments.



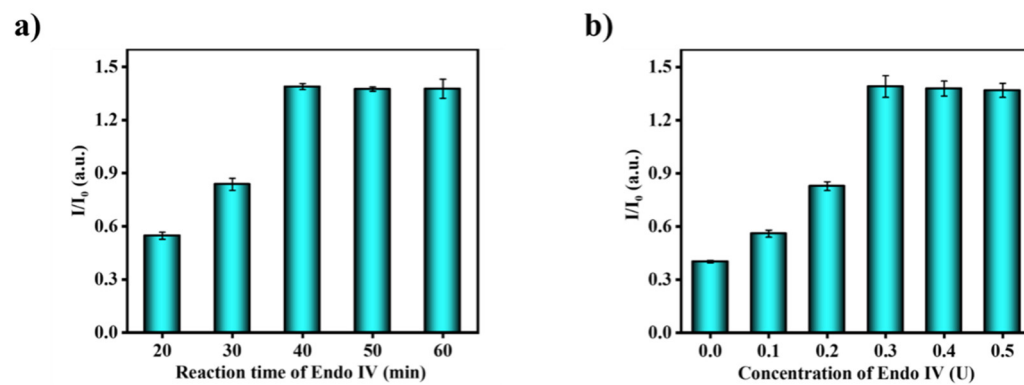

**Figure S2.** Optimization of experimental conditions on analytical performance. (a) Endo IV reaction time. (b) The amounts of Endo IV.

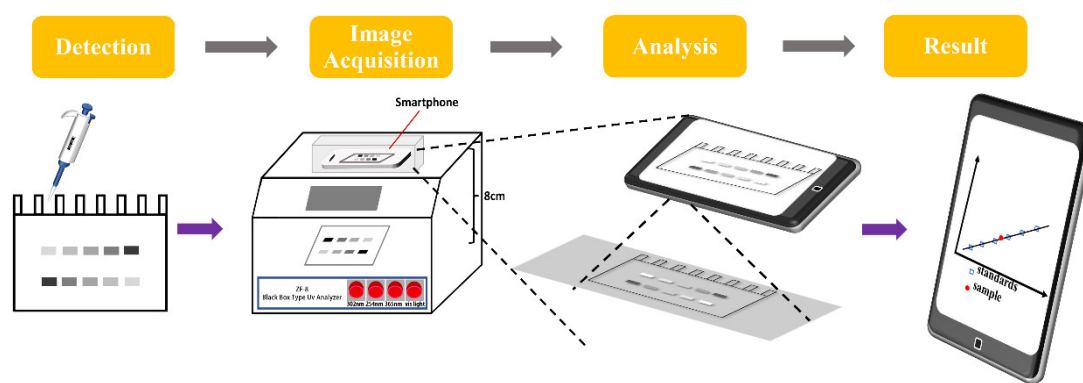

**Figure S3.** Schematic diagram of smartphone-based gel electrophoresis analysis for quantifying specific target.

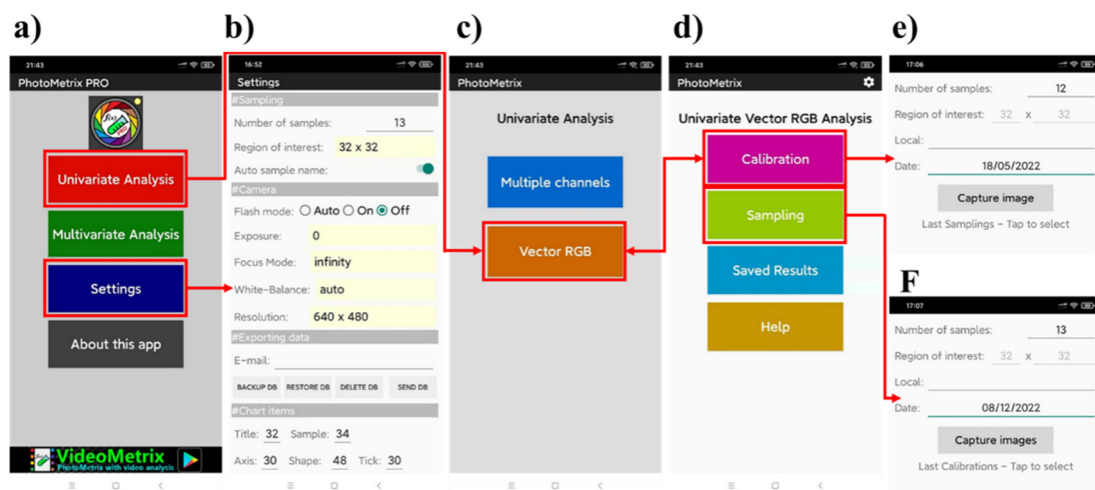

**Figure S4.** PhotoMetrix® application interfaces: (a) Home screen. (b) Settings screen. (c) Choice of color model for univariate analysis. (d) Interface for univariate analysis. (e) Build the calibration curves and (f) Sampling.

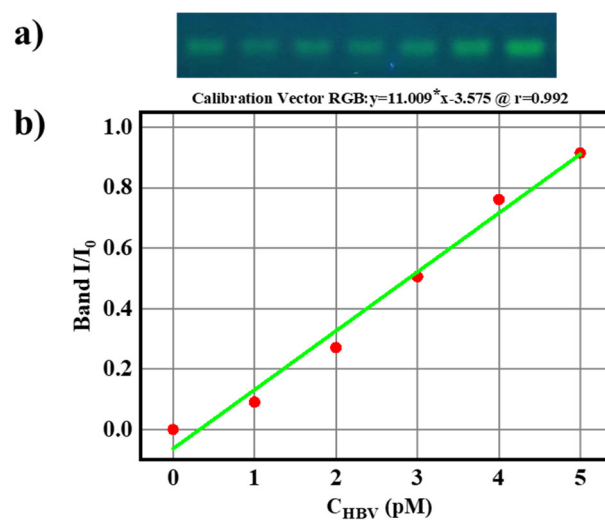

**Figure S5.** (a) Gel image acquired by smart phone camera. (b): Linear correlation between  $I/I_0$  and HBV concentrations range from 0 pM to 5 pM acquired by PhotoMetrix® software.

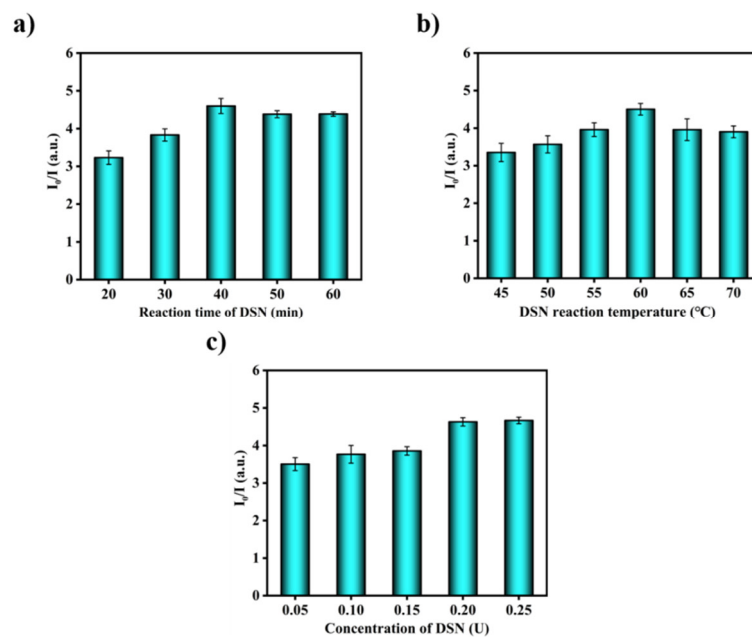

**Figure S6.** Optimization of experimental conditions on analytical performance. (a) The reaction time of DSN cleavage double-stranded. (b) Reaction temperatures of DSN. (c) The amount of DSN.

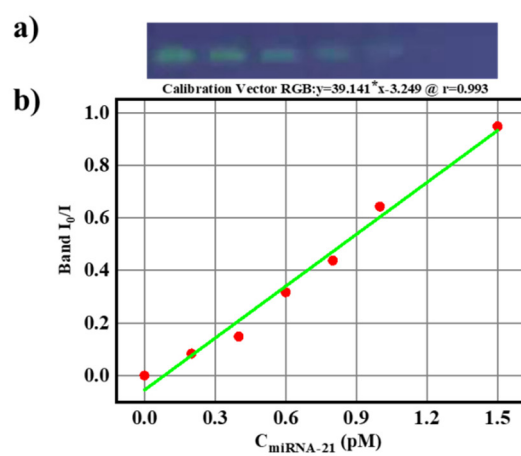

**Figure S7.** (a) Gel image acquired by smart phone camera for miRNA assay. (b) Linear correlation between  $I/I_0$  and miRNA concentrations range from 0 pM to 1.5 pM acquired by PhotoMetrix® software.
